# Supplementary material for: Hypothalamic corticotropin-releasing hormone neurons modulate sevoflurane anesthesia and the post-anesthesia stress responses
Source: eLife. 2024 Nov 11;12:RP90191. doi: 10.7554/eLife.90191 (PMC11554309; doi:10.7554/eLife.90191)
Supplement: Figure 2—source data 1. [file elife-90191-fig2-data1.xlsx]

## Sheet: Sheet1
Figure 2
E	△F/F
Pre	During	Post 1	Post 2
-4.91786e-05	-1.1498	-1.08909	0.429298
6.59063e-05	-1.37409	-0.901153	0.353611
-0.00141499	-1.91341	-1.35981	0.305712
-5.98849e-05	-1.12711	-0.910224	0.525074
F	Groomming time (%)
Pre	During	Post 1	Post 2
15.3173	0	0	43.1242
30.0556	0	0	40.8117
23.2056	0	0	57.5271
15.4085	0	0	50.7886
