# Supplementary material for: Hypothalamic corticotropin-releasing hormone neurons modulate sevoflurane anesthesia and the post-anesthesia stress responses
Source: eLife. 2024 Nov 11;12:RP90191. doi: 10.7554/eLife.90191 (PMC11554309; doi:10.7554/eLife.90191)
Supplement: Figure 3—figure supplement 1—source data 1. [file elife-90191-fig3-figsupp1-data1.xlsx]

## Sheet: Sheet1
Figure 4-figure supplement 6
A	Gromming time (%)
Time from RORR (min)	Sevo				O2
10	9.4358	5.68643	4	2.92	7.08	4.75	6.33	4.08
30	16.7315	5.36149	10.92	6.92	2.83	2.17	4.08	4.17
50	26.6537	20.2275	14.42	14.67	4.58	12.92	3.17	1.67
70	28.6965	33.8749	30.17	19.42	14.83	17.75	6	13.58
90	18.4825	34.8497	31.42	35.5	14.17	13	3.5	15.58
B	Mean bout duration (s)
Time from RORR (min)	Sevo				O2
10	32.3333	14	11.6667	8.2	7.72727	9.5	8.44444	16.3333
30	11.4667	16.5	16.6	11.85	5.66667	8.66667	4.9	5
50	34.25	27.6667	17.6	23.1	18.3333	14.0909	5.42857	6.66667
70	73.75	59.5714	68.8333	51	17.8	35.5	5.14286	27.1667
90	190	107.25	143.667	117.6	56.6667	60.8571	7	31.1667
C	Grooming bouts (min)
Time from RORR (min)	Sevo				O2
10	3	5	3	4	11	6	9	3
30	10	4	5	7	6	3	10	10
50	8	9	10	9	3	11	7	3
70	4	7	6	8	10	6	14	6
90	1	4	3	4	3	7	6	6
D	Paw licking (%)
Sevo	Control	Swim	Spray	Attack	Restraint
10.9049	39.5872	12.08	2.43	54.38	10.08
32.2581	23.86	6.07	5.42	36.51	7.09
21.58	30.5816	5.08	12.05	26.74	22.22
22.56	31.43	8.92	12.67	25.05	25.43
E	Body grooming (%)
Sevo	Control	Swim	Spry	Attack	Restraint
59.1647	46.3227	85.11	72.82	39.68	68.26
31.6129	51.5	93.52	46.25	36.96	72.54
45.38	46.71	87.74	64.73	33.26	61.11
47.2973	55.1595	87.41	46.38	35.489	63.1
F	Head/nose/face grooming (%)
Sevo	Control	Swim	Spry	Attack	Restraint
29.9304	27.2045	2.8	24.73	28.7	21.65
36.129	24.5779	0.4	48.33	23.81	20.37
33.02	17.81	7.17	23.21	30	16.67
24.25	8.57	3.66	40.95	29.46	11.47
