# Supplementary material for: Hypothalamic corticotropin-releasing hormone neurons modulate sevoflurane anesthesia and the post-anesthesia stress responses
Source: eLife. 2024 Nov 11;12:RP90191. doi: 10.7554/eLife.90191 (PMC11554309; doi:10.7554/eLife.90191)
Supplement: Figure 3—source data 1. [file elife-90191-fig3-data1.xlsx]

## Sheet: Sheet1
Figure 3
A	Incorrect transitions (%)
	O2				Sevo
0-50 min	35	42	44	29	41	35	37	31
50-100 min	43.6782	52.9412	40	37	67	54	56	78
B	Interrupted bouts (%)
	O2				Sevo
0-50 min	35	42	24	19	41	35	37	31
50-100 min	37.607	40.4251	39.78	28.17	64.6109	69.6507	75.3367	83.1967
D	Mean bout duration (s)
Sevo	Control	Swim	Spray	Attack	Restraint
190	3.3	87.4	11.625	13	32.875
107.25	8.8	95.57	27.65	14.64	27
143.667	21.9	98.8	24.88	5.11	29.13
117.6	5	58	30.05	7	35.47
E	Transitions per bout
Sevo	Control	Swim	Spray	Attack	Restraint
1.57	0.25	4.8	5.75	1	3.375
2.5	1.2	4	4.53	2.27	3.75
1.67	1.5	3.8	4.44	0.44	3.26
2.6	0.86	5	6	1.11	4.41
F	Grooming bouts (/min)
Sevo	Control	Swim	Spray	Attack	Restraint
0.125	0.25	0.4	0.85	0.85	0.8
0.275	0.35	0.5	0.6	1.1	0.6
0.25	0.25	0.45	0.5	0.45	0.75
0.225	0.35	0.4	0.95	0.45	0.85
