# Supplementary material for: Hypothalamic corticotropin-releasing hormone neurons modulate sevoflurane anesthesia and the post-anesthesia stress responses
Source: eLife. 2024 Nov 11;12:RP90191. doi: 10.7554/eLife.90191 (PMC11554309; doi:10.7554/eLife.90191)
Supplement: Figure 4—figure supplement 1—source data 1. [file elife-90191-fig4-figsupp1-data1.xlsx]

## Sheet: Sheet1
Figure 4-figure supplement 6
A	RORR%			B	RORR%
Sevo concentration	Vehicle	CNO		Sevo concentration	Vehicle	CNO
1	100	100		1	100	100
1.1	100	100		1.1	100	100
1.2	100	100		1.2	100	100
1.3	90	90.9091		1.3	60	50
1.4	80	90.9091		1.4	60	20
1.5	60	90.9091		1.5	50	10
1.6	30	81.8182		1.6	30	0
1.7	27	63.6364		1.7	20	0
1.8	17	36.3636		1.8	20	0
1.9	0	18.1818		1.9	0	0
2	0	0		2	0	0
C	LORR%			D	RORR%
Sevo concentration	Vehicle	CNO		Sevo concentration	Vehicle	CNO
1	0	0		1	100	100
1.1	0	0		1.1	100	100
1.2	14.286	14.2857		1.2	100	85.7143
1.3	14.286	14.2857		1.3	60	85.7143
1.4	28.571	42.8571		1.4	60	71.4286
1.5	57	42.8571		1.5	50	50
1.6	71.429	57.1429		1.6	30	42.8571
1.7	100	100		1.7	20	42.8571
1.8	100	100		1.8	20	14.2857
1.9	100	100		1.9	0	0
2	100	100		2	0	0
