# Supplementary material for: Hypothalamic corticotropin-releasing hormone neurons modulate sevoflurane anesthesia and the post-anesthesia stress responses
Source: eLife. 2024 Nov 11;12:RP90191. doi: 10.7554/eLife.90191 (PMC11554309; doi:10.7554/eLife.90191)
Supplement: Figure 4—figure supplement 2—source data 1. [file elife-90191-fig4-figsupp2-data1.xlsx]

## Sheet: Sheet1
Figure 4-figure supplement 6
C	LORR%			D	RORR%
Sevo concentration	Vehicle	Casp3		Sevo concentration	Vehicle	Casp3
1	0	0		1	100	100
1.1	0	14.2857		1.1	100	85.7143
1.2	14.286	14.2857		1.2	100	85.7143
1.3	14.286	42.8571		1.3	60	55.7143
1.4	28.571	57.1429		1.4	60	31.4286
1.5	57	79		1.5	50	21.4286
1.6	71.429	100		1.6	30	14
1.7	100	100		1.7	20	0
1.8	100	100		1.8	20	0
1.9	100	100		1.9	0	0
2	100	100		2	0	0
E	Time to induction (s)			F	Time to emergence (s)
Vehicle	CNO			Vehicle	CNO
184	31			111	370
171	63			103	254
207	105			124	252
192	38			172	185
258	117			108	200
184	15			144	240
144	15			187	271
143	15			147	395
