# Supplementary material for: Hypothalamic corticotropin-releasing hormone neurons modulate sevoflurane anesthesia and the post-anesthesia stress responses
Source: eLife. 2024 Nov 11;12:RP90191. doi: 10.7554/eLife.90191 (PMC11554309; doi:10.7554/eLife.90191)
Supplement: Figure 4—figure supplement 3—source data 1. [file elife-90191-fig4-figsupp3-data1.xlsx]

## Sheet: Sheet1
Figure 4-figure supplement 7
D	Time to induction (s)
	mcherry						chR2
light off	109	93	166	181	246	363	152	216	170	162	176	180
light on	165	165	195	255	135	165	368	228	232	228	188	452
E	Time to emergence (s)
	mcherry						chR2
light off	109	93	166	181	246	363	220	206	320	235	266	184
light on	127	127	176	255	135	165	108	168	44	33	44	220
