# Supplementary material for: Hypothalamic corticotropin-releasing hormone neurons modulate sevoflurane anesthesia and the post-anesthesia stress responses
Source: eLife. 2024 Nov 11;12:RP90191. doi: 10.7554/eLife.90191 (PMC11554309; doi:10.7554/eLife.90191)
Supplement: Figure 4—source data 1. [file elife-90191-fig4-data1.xlsx]

## Sheet: Sheet1
Figure 4
D	LORR%						E	LORR%
Sevo concentration	Vehicle	CNO		Vehicle	CNO		Sevo concentration	Vehicle	CNO		Vehicle	CNO
1	0	0		1.4	1.4		1	0	0		1.4	1.1
1.1	0	0		1.5	1.5		1.1	0	12.5		1.5	1.2
1.2	0	0		1.5	1.6		1.2	0	25		1.5	1.3
1.3	0	0		1.5	1.7		1.3	0	32.5		1.5	1.4
1.4	10	10		1.6	1.7		1.4	12.5	87.5		1.6	1.4
1.5	40	20		1.6	1.7		1.5	50	100		1.6	1.4
1.6	90	30		1.6	1.7		1.6	87.5	100		1.6	1.4
1.7	100	70		1.6	1.8		1.7	100	100		1.7	1.5
1.8	100	100		1.6	1.8		1.8	100	100
1.9	100	100		1.7	1.8		1.9	100	100
2	100	100					2	100	100
F	Time to induction (s)						G	Time to emergence (s)
mcherry		M3		M4			mcherry		M3		M4
Vehicle	CNO	Vehicle	CNO	Vehicle	CNO		Vehicle	CNO	Vehicle	CNO	Vehicle	CNO
184	256	195	285	240	135		111	139	147	146	166	184
171	234	195	270	225	165		103	109	175	142	169	207
207	215	195	225	225	191		124	118	132	121	170	192
192	191	150	214	195	153		172	191	123	112	171	258
258	183	210	285	173	136		108	183	172	140	173	184
184	123	180	204	180	116		144	123	147	115	144	256
144	168	210	225	225	108		187	168	153	113	112	234
		178	255	210	120				169	108	126	215
		230	215						120	116
		216	208						146	154
