# Supplementary material for: Hypothalamic corticotropin-releasing hormone neurons modulate sevoflurane anesthesia and the post-anesthesia stress responses
Source: eLife. 2024 Nov 11;12:RP90191. doi: 10.7554/eLife.90191 (PMC11554309; doi:10.7554/eLife.90191)
Supplement: Figure 5—source data 2. [file elife-90191-fig5-data2.xlsx]

## Sheet: Sheet1
Figure 5
E	Total power(%)
	Pre-stim							Stim
Delta	71.5671	47.4377	64.7879	60.2305	59.1297	59.1553		65.7716	52.4688	62	61	64	58
Theta	16.1518	30.7605	18.2957	24.7917	26.8959	23.7085		16.3296	31.134	24	26	20	28
Alpha	4.05801	9.41097	7.24998	7.44422	6.61912	8.5637		4.18615	11.1132	7	8	12	7
Beta	3.87646	4.35827	6.11645	6.66072	5.5447	5.70876		6.05651	4.94454	7	5	4	7
F	Total power(%)
	Pre-stim							Stim
Delta	64.7879	60.2305	59.1297	59.1553	62	61		33.1219	31.2934	41.9961	54.5143	40	50
Theta	18.2957	24.7917	26.8959	23.7085	24	26		39.7417	42.0665	27.3482	25.0446	40	30
Alpha	7.24998	7.44422	6.61912	8.5637	7	8		13.5978	12.8127	13.5897	9.68893	12	10
Beta	6.11645	6.66072	5.5447	5.70876	7	5		10.7346	12.6596	13.6513	7.88301	8	10
