# Supplementary material for: Hypothalamic corticotropin-releasing hormone neurons modulate sevoflurane anesthesia and the post-anesthesia stress responses
Source: eLife. 2024 Nov 11;12:RP90191. doi: 10.7554/eLife.90191 (PMC11554309; doi:10.7554/eLife.90191)
Supplement: Figure 6—source data 1. [file elife-90191-fig6-data1.xlsx]

## Sheet: Sheet1
Figure 6
E	Total power(%)
	Pre-stim							Stim							Post-stim
Delta	43.6916	64.1139	62.5897	58.5033	61	55		54.477	58.6837	58.8793	63.6869	60	56		58.0502	69.427	63.4462	64	56	46
Theta	26.9179	9.56228	18.0202	16.0119	20	15		21.7468	13.299	16.312	11.4044	17	16		20.6993	12.8888	13.7434	12.5648	15	18
Alpha	5.79408	2.85377	5.51555	4.33532	4	6		4.05354	3.63067	4.98226	4.32149	4	5		4.99859	3.22248	4.6098	5.50815	5	4
Beta	4.38077	1.92856	3.50271	2.4562	2	5		3.5381	2.31626	3.91838	1.96729	2	4		3.52617	3.18238	2.83327	2.71389	2	3
F	BSR (%)
Pre-stim	Stim	Post-stim
33	32	34
31	34	29
40	37	41
61	58	62
40.5	42	43
56	55	58
G	Total power(%)
	Pre-stim							Stim							Post-stim
Delta	55.1755	60.4499	48.6636	51.0949	54	57		38.6766	47.6663	36.9877	42.4931	40	39		39.7962	32.7766	31.4729	45.4423	40	33
Theta	27.8401	18.0676	18.5112	32.1756	20	27		34.6372	26.9377	30.3899	36.3284	30	35		29.316	41.7051	31.7723	34.1125	33	38
Alpha	6.58475	3.81581	9.463	7.0297	8	7		8.67656	10.453	15.0772	10.3738	11	12		12.2831	12.4616	17.7269	11.451	13	15
Beta	3.73095	2.56586	5.05551	4.63283	4	3		6.95417	6.52985	10.669	6.09285	7	8		8.99497	7.76343	15.2015	6.50732	8	9
H	BSR (%)
Pre-stim	Stim	Post-stim
30	12	4
31	15	9
40	20	11
60	8	12
42	14	3
59	15	8
