# Supplementary material for: Hypothalamic corticotropin-releasing hormone neurons modulate sevoflurane anesthesia and the post-anesthesia stress responses
Source: eLife. 2024 Nov 11;12:RP90191. doi: 10.7554/eLife.90191 (PMC11554309; doi:10.7554/eLife.90191)
Supplement: Figure 7—figure supplement 1—source data 1. [file elife-90191-fig7-figsupp1-data1.xlsx]

## Sheet: Sheet1
Figure 7-figure supplement 9
A	Y-maze test	Discrimination index		B	NOR	The preference of objects
o2（ns）	sevo	sevo-cno			o2（ns）	sevo	sevo-cno
0.60281	0.578455	0.100397			0.736923	0.733048	0.434509
0.744855	0.557821	0.458548			0.848373	0.758839	0.47336
0.674941	0.624321	0.307958			0.81591	0.665792	0.219764
0.59986	0.606386	0.454124			0.740458	0.678827	0.494663
0.481265	0.623395	0.497279			0.817466	0.779894	0.760194
0.603105	0.615385	0.674983			0.796656	0.751905	0.55414
