# Supplementary material for: Hypothalamic corticotropin-releasing hormone neurons modulate sevoflurane anesthesia and the post-anesthesia stress responses
Source: eLife. 2024 Nov 11;12:RP90191. doi: 10.7554/eLife.90191 (PMC11554309; doi:10.7554/eLife.90191)
Supplement: Figure 7—source data 1. [file elife-90191-fig7-data1.xlsx]

## Sheet: Sheet1
Figure 7
C	c-fos+ neurons in the PVH
	O2					Sevo
Saline	160	173	115	96		256	166	227	243
CNO	76	85	97	67		39	57	136	67
D	CRF (pg/ml)
	O2					Sevo
Saline	25.03	24.49	26.48	23.82		26	26.94	27.78	26.34
CNO	22.97	22.9	21.7	22.23		23.18	25.67	24.83	26.04
E	CORT (ng/ml)
	O2					Sevo
Saline	36.23	27.66	34.2	33		54.41	79.67	38.77	68.07
CNO	32.57	22.62	21.54	27.56		32.09	24.08	32.09	26.92
F	Grooming (%)
	O2								Sevo
Saline	32.7211	15.3173	15.1454	28.5097	15.4085	25.8094	27		43.1242	57.5271	45.1734	42.1136	50.7886	48.9925	47.2587
CNO	22.9787	23.9773	10.0286	13.675	29.9066	26.4663	27		20.0811	27.8759	28.2584	14.7746	28.0127	20.2736	17.5909
G	Central distance (%)
	O2								Sevo
Saline	24.4059	27.3253	25.1404	37.1402	35.8225	28.5768	17.8468		12.2119	21.5958	13.5065	21.8799	10.7493	6.02385	15.0233
CNO	29.2292	21.7907	21.2928	26.6192	28.294	25.3012	21.3373		28.5663	23.746	40.3882	20.733	17.6633	21.4142	38.9353
H	Time spend in open arms (%)
	O2								Sevo
Saline	12	15.1095	7.06927	11.8245	5.08524	5.42035	14.3785		0	1.24061	4.57285	3.24425	0.165731	1.37208	0.532129
CNO	4.71018	11.3228	4.49804	10.0358	7.33763	8	9		10.8206	17.2844	2.07312	17.3835	9.74036	6.90636	7
