# Supplementary figures and images for: Hypothalamic corticotropin-releasing hormone neurons modulate sevoflurane anesthesia and the post-anesthesia stress responses
Source: eLife journal article supplement (doi:10.7554/elife.90191), 2023-10-02

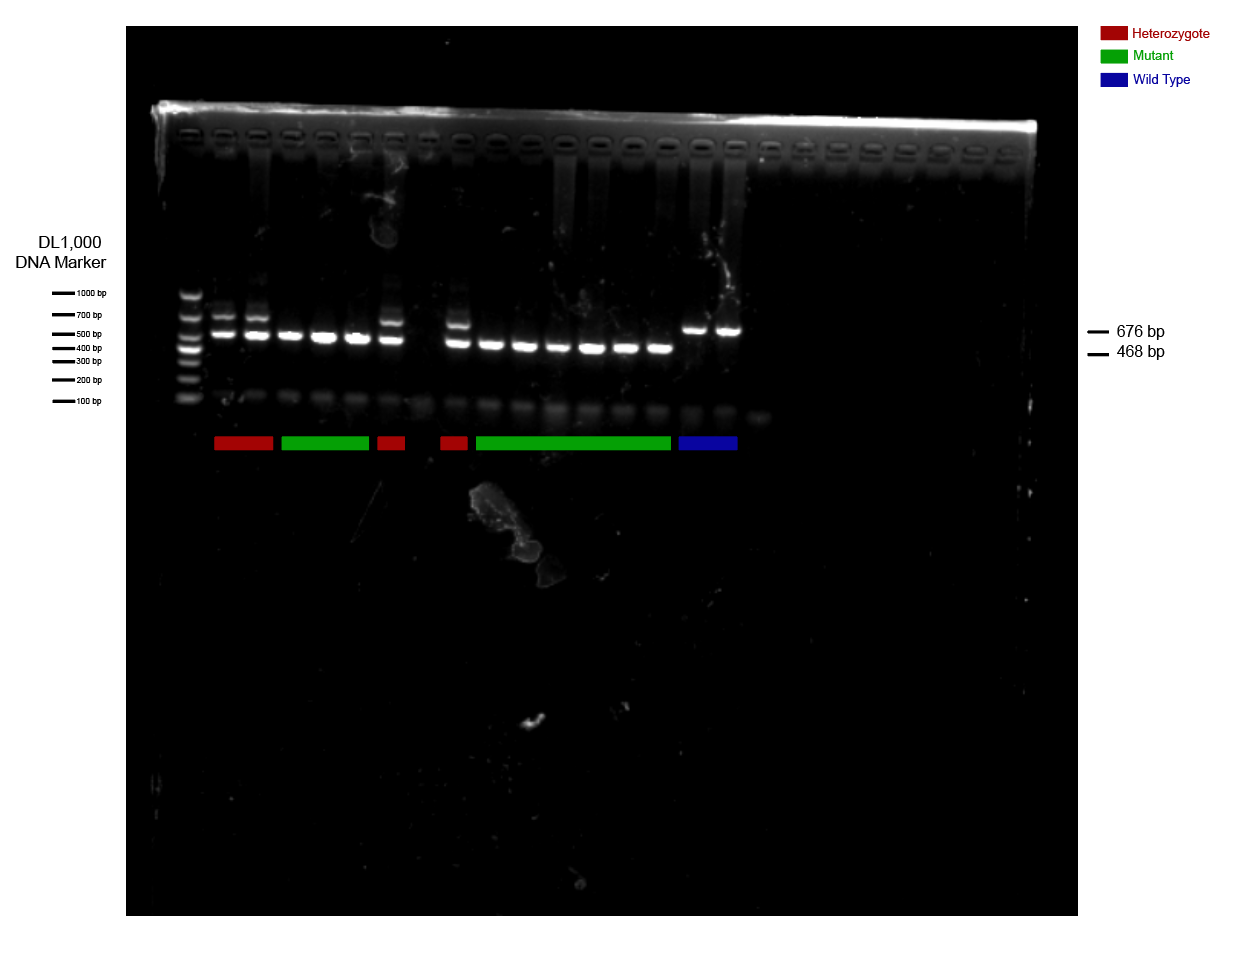

Supplement: fig1-figsupp3-data2 [file elife-90191-fig1-figsupp3-data2-v1.zip]
